# Supplementary material for: The Pollino 2012 seismic sequence: clues from continuous radon monitoring
Source: Copernicus journal article supplement (doi:10.5194/se-2016-72), 2016-05-12
Supplement: Supplementary file 1 [file se-2016-72-supplement.pdf]

# Supporting Information for “The Pollino 2012 seismic sequence: clues from long term continuous radon monitoring”

Antonio Piersanti<sup>1</sup>, Valentina Cannelli<sup>1</sup>, and Gianfranco Galli<sup>1</sup>

<sup>1</sup>Istituto Nazionale di Geofisica e Vulcanologia, Rome, ITALY

*Correspondence to:* Antonio Piersanti (antonio.piersanti@ingv.it)

## **Contents of this file**

1. Figures S1 to S2
2. Table S1

## **1 Introduction**

- 5 This supporting information contains additional experimental data from the two radon monitoring stations (MMN and MMNG), installed in Pollino during the long term continuous radon experiment. These data include: (i) the complete timeseries of data collected by station MMN from December 7, 2011 to October 6, 2014 (Figure 1) and by station MMNG from October 28, 2012 to October 6, 2014 (Figure 2) and (ii) the technical features characterizing the two stations (Table 1).

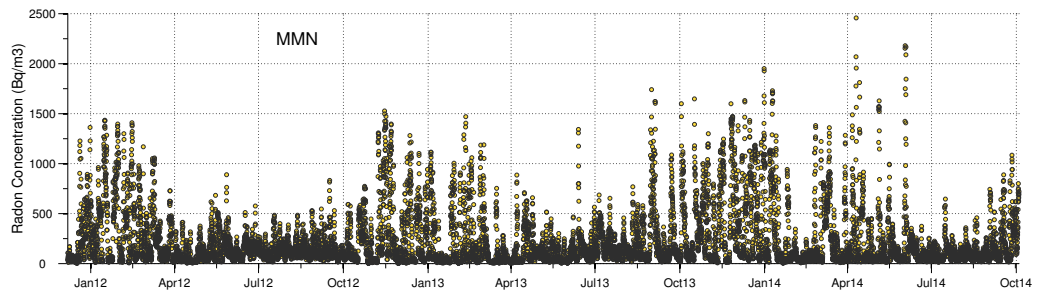

**Figure 1.** MMN timeseries in concentration  $[Bq\ m^{-3}]/115\ min$  for the entire acquisition period (December 7, 2011 - October 6, 2014).

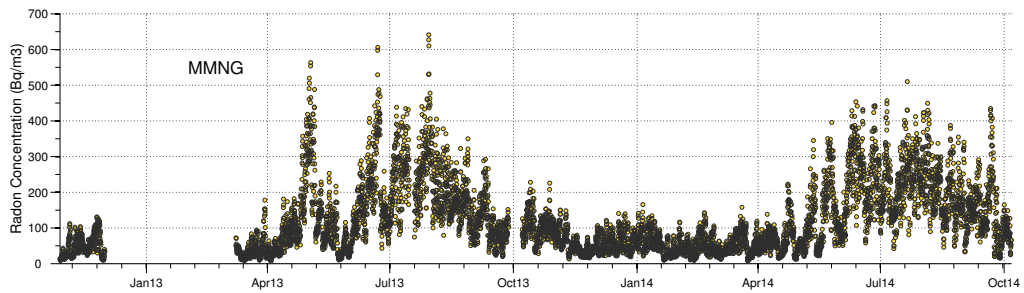

**Figure 2.** MMNG timeseries in concentration  $[Bq\ m^{-3}]/115\ min$  for the entire acquisition period (October 28, 2012 - October 6, 2014).

**Table 1.** Technical characteristics of radon monitoring stations MMN and MMNG in the study area.

|                                                     | MMN                   | MMNG                  |
|-----------------------------------------------------|-----------------------|-----------------------|
| (lon,lat)[deg]                                      | (15.9904,39.8996)     | (16.0260,39.8856)     |
| alt [m]                                             | 921                   | 858                   |
| background [cpm]                                    | 0.54                  | 0.54                  |
| efficiency [cpm Bq <sup>-1</sup> m <sup>3</sup> ]   | 0.0600 ± 0.0008       | 0.0608 ± 0.0009       |
| sampling rate [min]                                 | 115                   | 115                   |
| low detection limit [cpm]                           | 0.21                  | 0.21                  |
| min. detectable concentration [Bq m <sup>-3</sup> ] | 3.4                   | 3.4                   |
| start-stop acq.date [dd.mm.yyyy]                    | 07.12.2011-06.10.2014 | 28.10.2012-06.10.2014 |
