# Supplementary material for: The Pollino 2012 seismic sequence: clues from continuous radon monitoring
Source: Copernicus journal article supplement (doi:10.5194/se-2016-72), 2016-05-12
Supplement: Supplementary file [file se-2016-72-AC1-supplement.pdf]

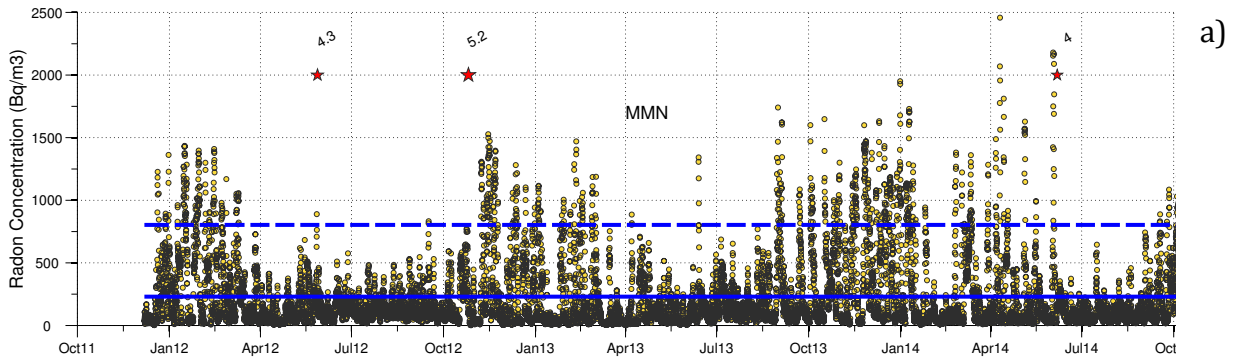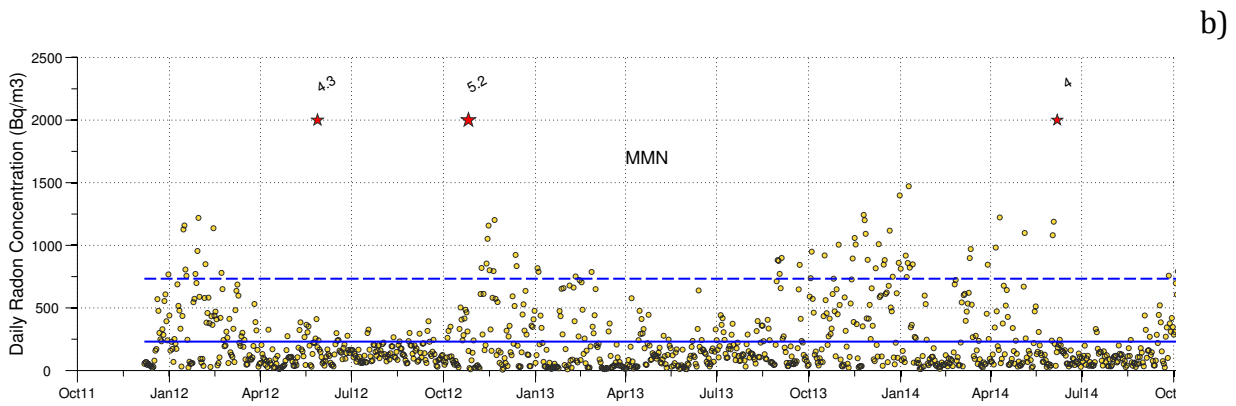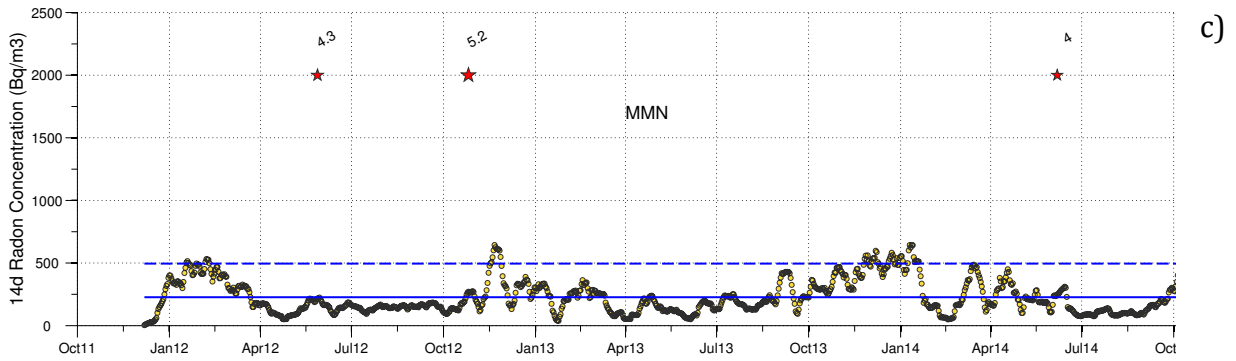

**Figure1R:** MMN radon concentration (yellow dots) in (Bq/m<sup>3</sup>)/115 min (a), daily average (b), 14-days moving average (c) from January 2012 to October 2014. Red stars represent the occurrences of the main earthquakes of the sequence. Blue solid and dashed lines represent mean value and 2SD, respectively. a), b) and c) show how the “anomaly” concept may depend from different sampling times of moving average employed.
